# Supplementary material
Source: Springer Nature journal article supplement (https://www.springermedizin.de/resource/supplementary/13054_2011_9755_MOESM2_ESM.pdf/9706928)
Supplement: MOESM2 [file 9706928]

**Total admissions in the ICU (n= 2550)**  
**Medical (n= 1504)**  
**Surgical, emergency (n= 795)**  
**Surgical, scheduled (n= 251)**

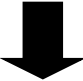

**Sepsis (n= 769)**  
**Trauma (n= 281)**  
**Other shock (n= 256)**  
**Postoperative (n= 127)**  
**Other (n= 1117)**

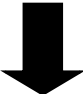

**Severe acidosis (pH<7.20) screened**  
**(n= 200)**

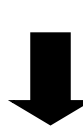

**Ketoacidosis (n=10)**  
**Respiratory acidosis (n=35)**

**Metabolic or mixed severe**  
**acidosis (n= 155)**

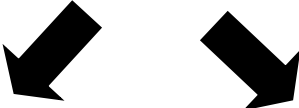

**Survivors**  
**(n= 66)**

**Non survivors**  
**(n= 89)**
